# Supplementary material
Source: MDPI journal article supplement (https://www.mdpi.com/2075-163X/8/9/399)
Supplement: s1 [file s1]

**Table S2.** Anisotropic displacement parameters ( $\text{\AA}^2$ ) for rusinovite from Shadil-Khokh volcano, South Ossetia.

| Atom | $U^{11}$    | $U^{22}$    | $U^{33}$    | $U^{12}$     | $U^{13}$     | $U^{23}$     |
|------|-------------|-------------|-------------|--------------|--------------|--------------|
| Ca1  | 0.01342(19) | 0.0137(2)   | 0.01235(19) | 0            | 0            | 0            |
| Ca2  | 0.01470(16) | 0.01252(17) | 0.02194(18) | 0            | 0            | −0.00047(11) |
| Ca3  | 0.01606(17) | 0.01149(18) | 0.0346(2)   | 0            | 0            | 0.00269(12)  |
| Si1  | 0.0103(4)   | 0.0091(2)   | 0.0104(2)   | −0.00024(14) | −0.00049(14) | 0.00024(16)  |
| Si2  | 0.0120(6)   | 0.0099(3)   | 0.0132(3)   | −0.0007(2)   | 0            | 0            |
| O1   | 0.019(2)    | 0.0132(5)   | 0.0146(5)   | 0.0026(6)    | 0.0035(6)    | −0.0014(4)   |
| O2   | 0.0142(19)  | 0.038(3)    | 0.024(3)    | 0            | 0            | −0.0009(18)  |
| O3   | 0.0102(8)   | 0.0139(10)  | 0.0210(10)  | 0            | 0            | 0.0008(8)    |
| O4   | 0.0194(11)  | 0.0193(7)   | 0.0158(6)   | 0.0006(5)    | 0.0043(5)    | 0.0044(6)    |
| O5   | 0.0187(5)   | 0.0101(5)   | 0.0252(6)   | 0            | 0            | 0.0021(4)    |
| O6   | 0.040(4)    | 0.0199(7)   | 0.0234(6)   | 0.0046(9)    | −0.0105(11)  | 0.0087(5)    |
| O7   | 0.0202(7)   | 0.0103(6)   | 0.0239(8)   | 0            | 0            | 0            |
| Cl1  | 0.0183(2)   | 0.0134(2)   | 0.0232(3)   | 0            | 0            | 0            |
