# Supplementary material
Source: MDPI journal article supplement (https://www.mdpi.com/2075-163X/8/9/399)
Supplement: s1 [file s1]

**Table S1.** Atom coordinates (x,y,z), equivalent isotropic displacement parameters ( $U_{\text{iso}}$ , Å<sup>2</sup>) and occupancies for rusinovite from Shadil-Khokh volcano, South Ossetia.

| Atom | <i>x</i>    | <i>y</i>     | <i>z</i>     | $U_{\text{eq}}$ | Occupancy |
|------|-------------|--------------|--------------|-----------------|-----------|
| Ca1  | 0           | 0.43100(3)   | 0.75         | 0.01315(11)     | 1         |
| Ca2  | 0.5         | 0.218412(19) | 0.608452(18) | 0.01639(10)     | 1         |
| Ca3  | 0           | 0.03273(2)   | 0.59702(2)   | 0.02072(11)     | 1         |
| Si1  | 0.43236(12) | −0.11787(3)  | 0.55026(3)   | 0.00992(17)     | 0.5       |
| Si2  | 0.92883(18) | 0.11161(5)   | 0.75         | 0.0117(2)       | 0.5       |
| O1   | 0.4512(10)  | −0.05644(9)  | 0.61762(8)   | 0.0156(8)       | 0.5       |
| O2   | 0.5         | 0.1190(3)    | 0.7326(3)    | 0.0254(15)      | 0.25      |
| O3   | 0           | 0.09507(13)  | 0.45996(13)  | 0.0150(5)       | 0.5       |
| O4   | 0.4266(4)   | 0.09578(9)   | 0.53517(9)   | 0.0181(5)       | 0.5       |
| O5   | 0           | 0.29063(7)   | 0.56856(7)   | 0.0180(3)       | 1         |
| O6   | 0.9521(18)  | 0.14824(10)  | 0.66946(10)  | 0.0277(13)      | 0.5       |
| O7   | 0           | 0.1643(9)    | 0.75         | 0.0181(4)       | 1         |
| Cl1  | 0.5         | 0.31223(3)   | 0.75         | 0.01828(14)     | 1         |
