# Supplementary material
Source: MDPI journal article supplement (https://www.mdpi.com/2075-163X/8/9/399)
Supplement: s1 [file s1]

**Table S3.** Selected interatomic distances (Å) for rusinovite from Shadil-Khokh volcano, South Ossetia.

| Atom                               | Atom    | distance (Å) |
|------------------------------------|---------|--------------|
| Ca1                                | O1 × 4  | 2.3117(14)   |
|                                    | O2 × 2  | 3.199(5)     |
|                                    | O7 × 2  | 2.3739(10)   |
|                                    | Cl1 × 2 | 2.7550(5)    |
| Ca2                                | O2      | 2.732(5)     |
|                                    | O2      | 3.229(5)     |
|                                    | O3      | 3.375(2)     |
|                                    | O4 × 2  | 2.4508(16)   |
|                                    | O5 × 2  | 2.3485(7)    |
|                                    | O5      | 3.0718(12)   |
|                                    | O6 × 2  | 2.329(5)     |
|                                    | O6 × 2  | 2.605(5)     |
|                                    | Cl1     | 2.9233(4)    |
| Ca3 coordination, with two O3 atom |         |              |
| Ca3                                | O1 × 2  | 2.301(3)     |
|                                    | O1 × 2  | 2.583(3)     |
|                                    | O2 × 2  | 3.347(4)     |
|                                    | O3      | 2.380(2)     |
|                                    | O3      | 2.600(2)     |
|                                    | O4 × 2  | 2.2061(15)   |
|                                    | O4 × 2  | 2.6358(14)   |
|                                    | O6 × 2  | 2.3321(18)   |
|                                    | O7      | 2.6659(4)    |
| Si1                                | O1      | 1.5656(15)   |
|                                    | O1      | 1.6242(18)   |
|                                    | O3      | 1.6817(7)    |
|                                    | O3      | 2.1781(6)    |
|                                    | O4      | 1.5275(16)   |
|                                    | O4      | 1.6170(16)   |
|                                    | O5      | 1.6027(12)   |
| Si2                                | O2 × 2  | 1.6465(12)   |
|                                    | O2 × 2  | 2.1742(10)   |
|                                    | O6 × 2  | 1.5302(18)   |
|                                    | O6 × 2  | 1.592(3)     |
|                                    | O7      | 1.6347(18)   |
